# Supplementary material for: Optimization of Key Technologies for Induction of Embryogenic Callus and Maturation of Somatic Embryos in Korean Pine (Pinus koraiensis)
Source: MDPI journal article supplement (doi:10.3390/f14040850), 2023-04-20
Supplement: s1 [file s1]

**Supplementary Table S1.** The preparation methods of mother liquor of mLV and DCR medium

| Category                              | mLV                                                                                       | Dosage<br>(g L <sup>-1</sup> ) | DCR                                                                                       | Dosage<br>(g L <sup>-1</sup> ) |
|---------------------------------------|-------------------------------------------------------------------------------------------|--------------------------------|-------------------------------------------------------------------------------------------|--------------------------------|
| Macroelements<br>(g L <sup>-1</sup> ) | ammonium nitrate (NH <sub>4</sub> NO <sub>3</sub> )                                       | 8.25                           | ammonium nitrate (NH <sub>4</sub> NO <sub>3</sub> )                                       | 4                              |
|                                       | potassium nitrate (KNO <sub>3</sub> )                                                     | 9.5                            | potassium nitrate (KNO <sub>3</sub> )                                                     | 3.4                            |
|                                       | potassium phosphate monobasic (KH <sub>2</sub> PO <sub>4</sub> )                          | 1.7                            | calcium nitrate tetrahydrate(CaNO <sub>3</sub> ·4H <sub>2</sub> O)                        | 5.56                           |
|                                       | magnesium sulfate heptahydrate (MgSO <sub>4</sub> ·7H <sub>2</sub> O)                     | 9.25                           | potassium phosphate monobasic (KH <sub>2</sub> PO <sub>4</sub> )                          | 1.7                            |
|                                       | calcium chloride dihydrate (CaCl <sub>2</sub> ·2H <sub>2</sub> O)                         | 0.11                           | magnesium sulfate heptahydrate (MgSO <sub>4</sub> ·7H <sub>2</sub> O)                     | 3.7                            |
|                                       |                                                                                           |                                | calcium chloride dihydrate (CaCl <sub>2</sub> ·2H <sub>2</sub> O)                         | 0.85                           |
|                                       |                                                                                           |                                |                                                                                           |                                |
| Microelements<br>(g L <sup>-1</sup> ) | potassium iodide (KI)                                                                     | 0.415                          | potassium iodide (KI)                                                                     | 0.62                           |
|                                       | boric acid (H <sub>3</sub> BO <sub>3</sub> )                                              | 3.1                            | boric acid (H <sub>3</sub> BO <sub>3</sub> )                                              | 2.23                           |
|                                       | manganese sulfate dihydrate (MnSO <sub>4</sub> ·2H <sub>2</sub> O)                        | 2.1                            | manganese sulfate dihydrate (MnSO <sub>4</sub> ·2H <sub>2</sub> O)                        | 0.86                           |
|                                       | zinc vitriol (ZnSO <sub>4</sub> ·7H <sub>2</sub> O)                                       | 4.3                            | zinc vitriol (ZnSO <sub>4</sub> ·7H <sub>2</sub> O)                                       | 0.025                          |
|                                       | sodium molybdate dihydrate (NaMoO <sub>4</sub> ·2H <sub>2</sub> O)                        | 0.125                          | sodium molybdate dihydrate (NaMoO <sub>4</sub> ·2H <sub>2</sub> O)                        | 0.083                          |
|                                       | anhydrous copper sulfate (CuSO <sub>4</sub> ·5H <sub>2</sub> O)                           | 0.05                           | anhydrous copper sulfate (CuSO <sub>4</sub> ·5H <sub>2</sub> O)                           | 0.0025                         |
|                                       | cobalt chloride hexahydrate (CoCl <sub>2</sub> ·6H <sub>2</sub> O)                        | 0.013                          | cobalt chloride hexahydrate (CoCl <sub>2</sub> ·6H <sub>2</sub> O)                        | 0.0025                         |
| Organic Matters (g L <sup>-1</sup> )  |                                                                                           |                                | nickel chloride (NiCl <sub>2</sub> )                                                      | 0.025                          |
|                                       | inositol(C <sub>6</sub> H <sub>12</sub> O <sub>6</sub> )                                  | 0.01                           | inositol(C <sub>6</sub> H <sub>12</sub> O <sub>6</sub> )                                  | 0.1                            |
|                                       | thiamine hydrochloride (C <sub>12</sub> H <sub>17</sub> ClN <sub>4</sub> OS·HCl)          | 0.05                           | thiamine hydrochloride (C <sub>12</sub> H <sub>17</sub> ClN <sub>4</sub> OS·HCl)          | 0.05                           |
|                                       | pyridoxine hydrochloride (C <sub>8</sub> H <sub>11</sub> NO <sub>3</sub> ·HCl)            | 0.01                           | pyridoxine hydrochloride (C <sub>8</sub> H <sub>11</sub> NO <sub>3</sub> ·HCl)            | 0.05                           |
|                                       | nicotinic acid (C <sub>6</sub> H <sub>5</sub> NO <sub>2</sub> )                           | 0.05                           | nicotinic acid (C <sub>6</sub> H <sub>5</sub> NO <sub>2</sub> )                           | 0.2                            |
|                                       |                                                                                           |                                | glycine (C <sub>2</sub> H <sub>5</sub> NO <sub>2</sub> )                                  | 0.2                            |
|                                       |                                                                                           |                                |                                                                                           |                                |
| Iron Salts<br>(g L <sup>-1</sup> )    | disodium ethylenediamine tetraacetate dihydrate (Na <sub>2</sub> ·EDTA·2H <sub>2</sub> O) | 3.73                           | disodium ethylenediamine tetraacetate dihydrate (Na <sub>2</sub> ·EDTA·2H <sub>2</sub> O) | 3.73                           |
|                                       | ferrous sulfate heptahydrate (FeSO <sub>4</sub> ·7H <sub>2</sub> O)                       | 2.78                           | ferrous sulfate heptahydrate (FeSO <sub>4</sub> ·7H <sub>2</sub> O)                       | 2.78                           |
